# Supplementary material for: Attapulgite-doped electrospun poly(lactic-co-glycolic acid) nanofibers enable enhanced osteogenic differentiation of human mesenchymal stem cells
Source: Royal Society of Chemistry journal article supplement (doi:10.1039/c4ra09839k), 2014-12-01
Supplement: c4ra09839k1.pdf [file c4ra09839k1.pdf]

## Electronic Supplementary Information

### **Attapulgite-doped electrospun poly(lactic-co-glycolic acid) nanofibers enable enhanced osteogenic differentiation of human mesenchymal stem cells**

**Zhe Wang<sup>a</sup>, Yili Zhao<sup>b</sup>, Yu Luo<sup>a</sup>, Shige Wang<sup>c</sup>, Mingwu Shen<sup>a</sup>, Helena Tomás<sup>d</sup>, Meifang Zhu<sup>c</sup>, and Xiangyang Shi<sup>\*acd</sup>**

<sup>a</sup> College of Chemistry, Chemical Engineering and Biotechnology, Donghua University, Shanghai 201620, People's Republic of China

<sup>b</sup> College of Textiles, Donghua University, Shanghai 201620, People's Republic of China

<sup>c</sup> State Key Laboratory for Modification of Chemical Fibers and Polymer Materials, Donghua University, Shanghai 201620, People's Republic of China

<sup>d</sup> CQM-Centro de Química da Madeira, Universidade da Madeira, Campus da Penteada, 9000-390 Funchal, Portugal

---

\*To whom correspondence should be addressed. E-mail: [xshi@dhu.edu.cn](mailto:xshi@dhu.edu.cn)

**Table S1.** Bulk density, apparent density, porosity, and water contact angle of PLGA and ATT-doped PLGA nanofibers.

| Samples    | Bulk density (g cm <sup>-3</sup> ) | Apparent density (g cm <sup>-3</sup> ) | Porosity (%) | Water contact angle (°) |
|------------|------------------------------------|----------------------------------------|--------------|-------------------------|
| PLGA       | 1.250                              | 0.350±0.013                            | 72.00±1.04   | 123.7±2.6               |
| PLGA-1%ATT | 1.255                              | 0.403±0.028                            | 67.75±2.24   | 120.2±3.7               |
| PLGA-2%ATT | 1.261                              | 0.412±0.047                            | 67.04±3.76   | 116.8±1.5               |
| PLGA-3%ATT | 1.266                              | 0.422±0.029                            | 66.24±2.32   | 113.5±2.1               |

**Table S2.** Hemolysis percentage (HP) of PLGA and ATT-doped PLGA nanofibers (all data are given as mean ± SD, n=3).

| Samples | PLGA    | PLGA-1%ATT | PLGA-2%ATT | PLGA-3%ATT |
|---------|---------|------------|------------|------------|
| HP (%)  | 1.2±0.1 | 0.64±0.13  | 0.65±0.09  | 0.56±0.21  |

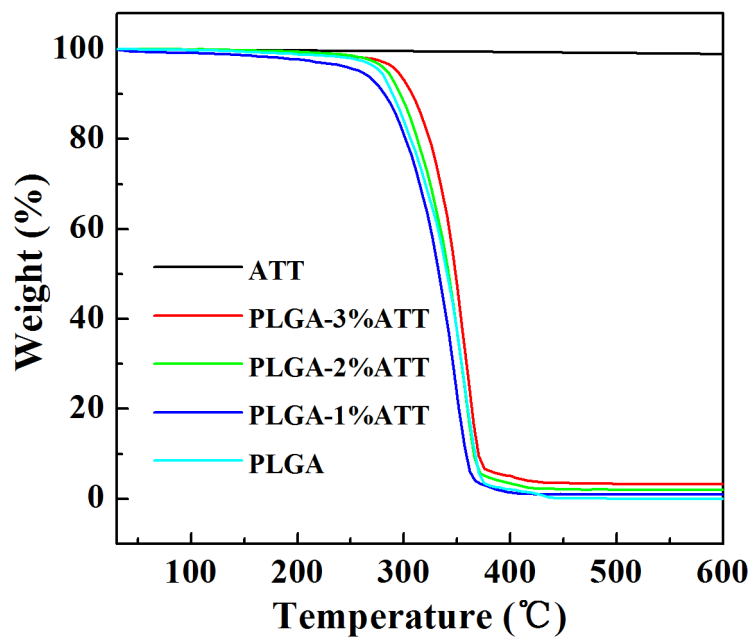

**Figure S1.** TGA curves of ATT nanorods, and PLGA and ATT-doped PLGA nanofibers with different ATT doping levels.

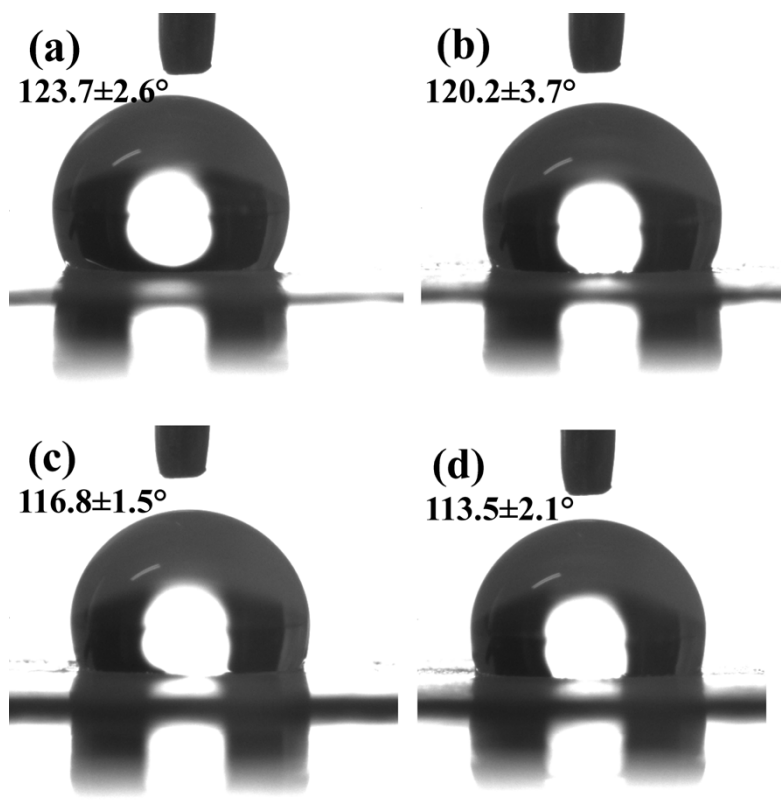

**Figure S2.** Water contact angles of PLGA (a), PLGA-1%ATT (b), PLGA-2%ATT (c), and PLGA-3%ATT (d) fibrous mats.

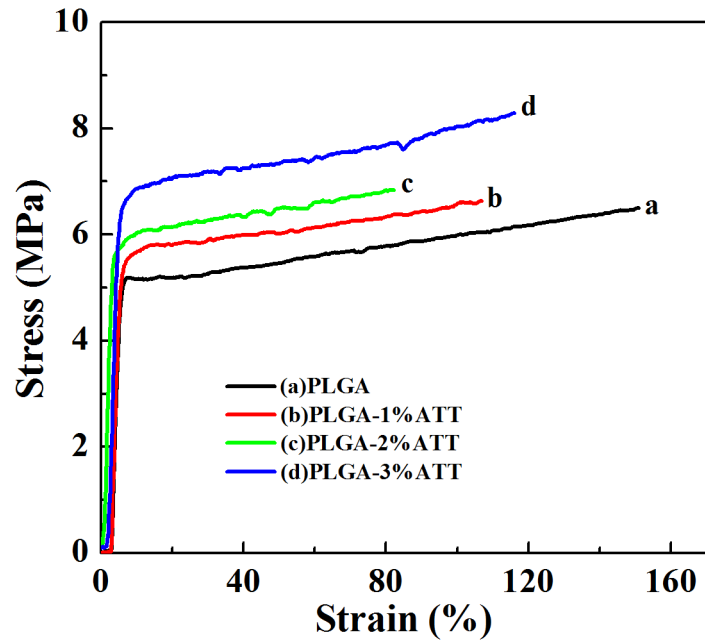

**Figure S3.** Strain-stress curves of PLGA (a), PLGA-1%ATT (b), PLGA-2%ATT (c), and PLGA-3%ATT (d) nanofibrous mats.

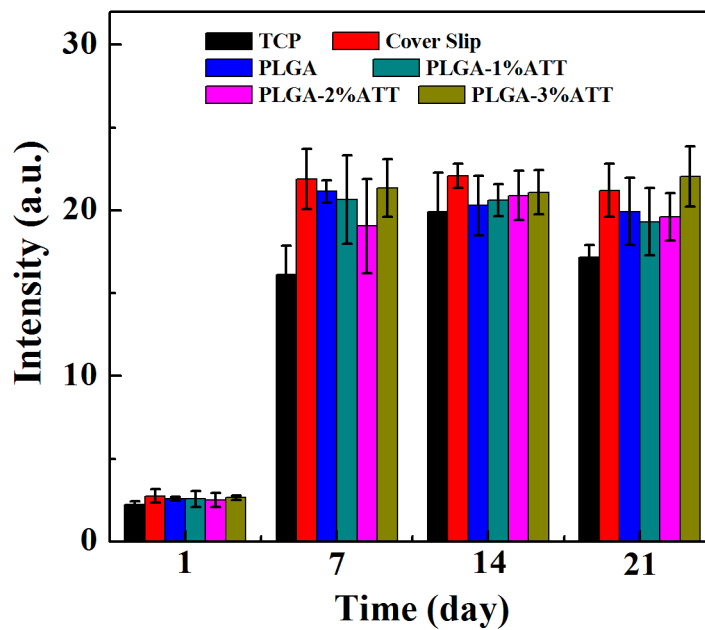

**Figure S4.** Metabolic activity assay of hMSCs cultured onto TCP, cover slip, PLGA, PLGA-1%ATT, PLGA-2%ATT, and PLGA-3%ATT nanofibers at different culture times.

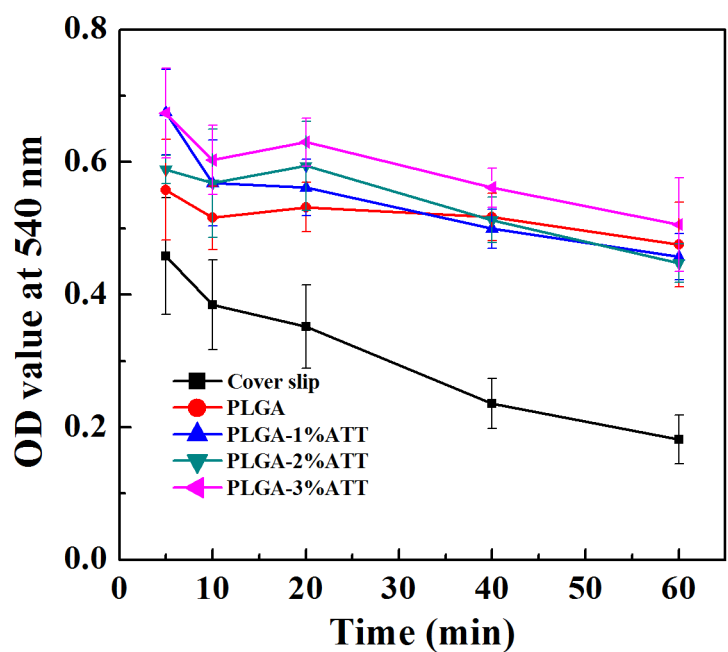

**Figure S5.** Anticoagulant assay of PLGA and ATT-doped PLGA nanofibers at different time intervals.

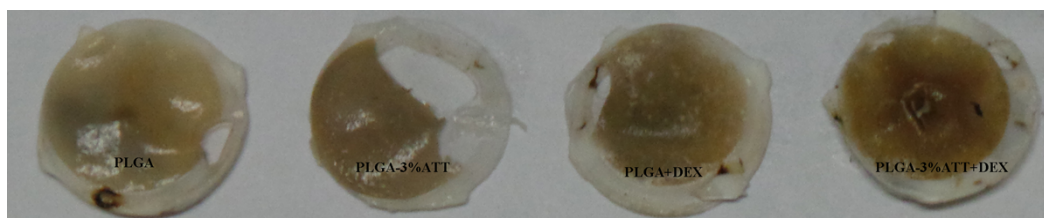

**Figure S6.** The picture of von Kossa staining of hMSCs cultured onto PLGA and PLGA-3%ATT nanofibers in growth medium (without DEX) and osteogenic medium (with DEX) on day 21.
